# Supplementary material for: Discovery of 33mer in chromosome 21 – the largest alpha satellite higher order repeat unit among all human somatic chromosomes
Source: PubMed Central journal article supplement (PMC6718397; doi:10.1038/s41598-019-49022-2), 2019-09-02

**Discovery of 33mer in chromosome 21 – the largest alpha satellite  
higher order repeat unit among all human somatic chromosomes**

Matko Glunčić<sup>1</sup>, Ines Vlahović<sup>1</sup>, Vladimir Paar<sup>1,2</sup>

<sup>1</sup>Faculty of Science, University of Zagreb, 10000 Zagreb, Croatia. <sup>2</sup>Croatian Academy of Sciences and Arts, 10000 Zagreb, Croatia.

**Supplementary Tables and Figures**

TGAAAAACATCTTTGTGATGTGTGCATTCATCTCAAAGAGTTCAACCTTTCTTTTGATGAGCACTTTTGAAATACCTTTTGGAGAATC  
TGTAAGTGGATATTTGGAGGGCTTTGGGTCCTATGGTGGTAAAGGAAACATCTTACATAAAAACTACACAGAAGCATTCTGAAATACC  
TCCTTTGTGATGCTTGCATTCATCTCACATAGTTGAACCATCTTTTATTTAGCAGCTTTTGAACAACTCCCTTTGTAGAATGTGCAAGT  
GGATATTTGGAACGCTTTGATGAGTATGGTGGAAAATGAAAAATCTTACATAAAAACTAGACAGAAGTACTCTGAGAACTCTTTGT  
GATGTGCACATTCATCTCACAAATTTGAAAATTTCTTTTGTATGAGCAGTTTGAACGCTCTTTTCTAGAATCTGCCAGTGGATATTT  
TGGAGTGCCTTTGAGTCCATGGTGGAGAAGGAAATATCTTACATAAAAACTAGAGAGAAGCATTCTGAGAACTCTTTGTGATGTGT  
GCATACATCTCACAGAGTTGAACTTTCTATTGATTTAGCATTTTTATACACTTTTTGTAGGATCTGCAGTTGCTATTTGGAGCCCTT  
TGGGGCCAAATGGTGGAAAAGTATTATCTTCTCATAAAAACTAGACAGAAGCATTTTGAGAACTTCTCTGTGATGTGTTTCTTATCTC  
ACAGATTTGAACCATCTTTTGTATTCAGCAGTTTGAACACTCTTCTGTAGAATCTGCAAGTGCATATTTAGATCGCTTTGAGAAGTGT  
GGTGGAAAAGGAAATATCTTACATAAACTAGACAGAAGCATTCTGAGAACTCTTTGTGATGTGTCCATTCTCACAGAGTTG  
AACTTTCTTTTCTATTGAGCAGTTTGAACACTCTTTTATAGAATCTGCAAGTGGATATTTGGAGCCCTTTGGAGAGAATGGTGGAA  
ATGGAATATCTTACATAAAAACTACGGAAGCATTCTGAGAAACGGCATTGTTATGTGTGCCTTCAGCTCACAGAGTTGAACCTTT  
CTTTTGTATGAGCAGTTTGAATCCCTCTTTTGTAGAATCTGCAAGTGGATATTTGGAGAGCTTTAGGGCCATGGTGGAAAAGGAA  
TATCTTACATAAAAACTACAAAAGCATTCTGAGAACTCTTCTGTATGTGTGCATCAAACTCCAGATTTGAATCTTTTGA  
TTGTGCAATTTTGAACACTCTTTTGTAGAACTCTGCAAGTGGATATTTGGAGGGCTTTGCCAGTATAGTGGAAAAGGAAATTAATTT  
GGATAAAAGGTAGACAGAACATCTGAGAACTCTTTGTGATGTGTGTCATTCTCACACAGTTCAACTTTCTTTTGTATGAGCAGTTGG  
GTTTTGAAACACTATTTTGTAAATATCTGCAAGTGGATATTTGGTGAACATTGCAAGCTATGGTGGAAAAGGCAAAATATCTTACATAAA  
AACTAGACAGAAGCATTCTGAGAACTCTTTTGTGATGTGTGTCATTCTCACAGAGTTGAACCTTTCTTTTGTATGAGCAGTTGGAAACAGTCTTTGATA  
AACAGTATTTTTCTACAATCTGCAAGGGATACTTCTAGCCGATTTAGGCCATGGTGAATAGGAAAATATCTTACATAAAAAATAA  
ACAGAAGCTTTCTGAGAACTCTTTGGGATGTGTGTTTTCTCATCTCACAGAGATGAACTTTCTTTTGTATGAGCAATTTGAACTCT  
CTTTTGTAGGATCTGCAAAATGGATATTTGGAGCCCTTTGAGCCCTGTGGTGGAAAAGGAAATATCTTACATAAACTACAGACAGAAG  
CACTTCTGAAACACTCTTTTGTGATGTGTGTCATTCTCACAGAGTTGAACCTTTCTTTTGTATGAGCAGTTGGAAACAGTCTTTTGTATA  
GTATCTGCAGAGAGATATTTGTGAGCATTTTGAGGACTTTGGTGGAAAAGGAAACCTCAAAAAAAACCAAGCAAAAGATTCTGAG  
AACTTCTTTGTGATGTGTGTCATTCAACTGACAGAGTTGAACTTTGTTTTGATGAGCAGTTGTAAACAGTCTTTTGTAGGATCTG  
CAAAGGATAGTTCTGGGCCATTGAGACCTATGGTGAAGAAAGAAATATCTTCACTTAAAACTAGACAGAAGCATTCTGAGAACTCT  
CTTAGTGTAGTGTGCTTTCTCATCTCACAGGTTTTGAACCTTTCTTTTGTATGAGCAGTTGGAAACAGTCTTTTGTAGAATCTGCA  
TATTTTGTAGCGCTTTGACGCCATGGTGAAGAAAGGACATATCTTACATGAAATCTAAACAGAAGCTTTCTGAGAACTCTTTTAT  
GAGTTCATACATCTCACAGAGTTGAACTTTCTTTTCTATTGAGCAGTTTGGAAACAGTCTTTTGTACAGTCTGCAAGGAAATTTCTG  
CGAAGTTGGAGCCATGGTGAAGAAAGAAATATCTTACAGATAAAATGTAGACAGAAGTATCTGAGAAAATTTTGTGATGTATCTAT  
TCATCTCACAGAGTTGAATTTTCTTTTGTAGGAGCAGTCTGGAACAGTCTTTTGTAGTATCTGAAAGGGATATGTGAGAGCAGTT  
TAAGCCCTGTGGTGAAGAAAGGAAATATCTTACATAAAAACTAGGATGAAAGCATTCTAAGAACTCTTTGTATGTGTGTCATCT  
CAAAGCTTTGAACCTGTCTTTGACTGAGCAGTTTGGAACTGTCTTTTGTAGAATCTGTGAAAGGATATTTCTGAGCCCATTTGAGCC  
CTATGGATGAAATAGGAAATATCTTACATAAAAACTAGACAGAGATTCTGAGAACTCTTTGTGATATGTGGTTTCTATCTCACAG  
AGTTGAACCATTTCTTTGGTTGAGCAGTTAGGAAACAGTATTTTGTAGGATCTGCAAGGGATATTTCTGTTCCCATTTGACGCCATG  
GTGAAAAGGACATATCTTACATAAAAACTAGACAGAAGCTTTCTGTATAAACTCTTAGTGTATGTGTGCTTTCTATGTCACAGATTGA  
AACTTTCTTTTGTATGAGCAGTTTGGAAACAGTCTTTTGTAGAATCTGCAAAATGGATATTTGGAGTGCCTTTGAGCCCTATGGTGA  
AGGAAATACCTTACATGAAATATAAACAGAAAGCTTTCTGAGAACTCTTTTGTAGCATGATACATCTCACAGAGTTGAAAGTTTCT  
TTTTCTATTGAGCAGTTTGGAAACAGTCTTTTGTACAATCTGGAATGGGATATTTCTGAGAAGTGGAGGCCATATCGAAAAAGAAAT  
ATCTTACATAAAAACTAGACAGAAGTATCTGAGAACTCTTTGAGATGTATCTTTCTATCTCACAGAGTTGAACCTTACTTTTGTAT  
GGAGCAGTTTGGAGCAGTCTTTTGTAGTATCTGCAGAGGGATATCTGAGAGCAGTTAAGGCCATGGTGAAGAAAGGAAATATCTT  
ACATAAAAACTAGGACAGAAGCATTCTGAGAACTCTTTTGTAGTATCTGCAAACTCAAAAGAGGTGAACTTTCTTTGATTTGAGCA  
GTTTTGAAACAGTCTTTTGCAGAATCTGCAAGGGATATTTCTCAGTCCATTGAGGCCATGGTGAAGTGAAGAAATAACTTCCATAA  
AAACAGACAGAAGGTTCTGAGAACTCTTTGAGATATGTGCTTTCTATCTCACAGAGCTGAACTTTCTTTTGGCTCAGAAAGTTTGG  
AAACAGTCTTTGTGTAAGTCTGCAAGCGCTATTTTGTAGCAGTCTTGTGACTATGGTGAACAGAAAATATCTTACATAAAAACTA  
GACAGAAGCTTTCTGAGAACTCTTTTATGATGTGTTCTTTCTATCTCACAGAGTTGAACTTTCTTTTGTATTGAGCAGTTTGGAAAC  
TCTTTATGGGAATCTGCAAGTGGATATTTGGAGTCTTTGTGGCTATAGTGGAAACGAAATATCTTACATAAAAACTAGACAGAA  
TCATTTCTGAGAACTCTTTTGTGATGTGCACATTCATCACAAAGAGTTGAACATTTCTTTCTGATTCAGCAGTTTGGAAACAGTCTTT  
GTAGAATCTGTGAAAGGATATTTCTCAGCCATTTGATGCCTATGGATGAAATAGGAAATATTTCTCACATAAAAACTAGACAGAAATTT  
CTGAGAACTTTCTTTATGATATGTGGTTTCTATCTCACAGAGTTGAACTTTCTTTTGGTTGAGCAGTTTGGAAACACTTTTTTGTAGA  
ATCTGCAAGTGGATATTTGGAGCAGTTGAGGCCATGGTGGAAAACGGAATATTTTACATAAAAACTAGACAGAAGCATTCTGAGAA  
ACTACTTTGTGATGTGTGTCATTCAACCCACAGAGTTCAACCTTTCTTTTGTATTCAGCAGTTTGAACACTCTTTTGTAAAACTGAC  
AGTGGATTTTGGAGCGCTTTGAGCCCTACGGTGGAAAAGGAAATATCTTACATAAAATAGTACACAGAAGCATTCTGAGAACTCTTT  
TGTGATGTGTGCATTTAACTCAAGAGTGAATCTTTCTTTTGTAGATTGAGCAGTTTGAAGACTCTTTTGCAGAATCTGCAAGTGGAT  
GTTTGGAGCGCTATGTGGCCCTTAAGTGGAAAAGGCAATATCTTACATAAAAACTAGACAAACAGCATTCTGAGAACTCTTTTGTGATG  
TGTGCATTCTCACAGAGTTGAAGCTTTCTTTTGTATTGAGCAGTTTGAACACTCTTTTGTAGAATCTCCAATTTGGATTTACTTGG  
CGTTTTTGGCCCTATGTGAGAAAAGTAAATATCTTCTCAGTGAACACTACACAGAAGCATTCTGAGAAATTTGTTGTGATGTGTGCAT  
TCAACACACAGAGTTGAACCTTTCTTTTGTATTGAGCAGTTTGAACACTCTTTTGTAGGATCTGCAAGTGGATATTTGGAGTGCCTT  
GTGGCCATATGCGGAAAAGGATATATTTTACATAAAAACTACGGAGAAGCATTCTGAGAACTCTTTTGTGATGTGTGTCATTCTATCT  
ACAGAGTTCAACCTTTCTTTTGTATTGAGCAGTTTGAACACTCTTTTGTAGAGTGTGCAAGCGGATATTTGGAGCTCTTTGAGGCTT  
ATGGTGGAAAAGGAAATATCTTACATAAAAACTACAGAGAAGCATTCTGCAAAAGTCTTTTGTGTTGTGTGTTCTCAACTACAGAGT  
TGAGTCTTTCTTTTGTATTGAGCAGTTTGAACACTCTTTTGTAGAATCTGCAAGTGGATATTTGAGTGCCTTTGAGCCCTGTTGG  
AAAAGGAAATATCTTACATAAAAACTAGACAGAAGCATTCTGAGAACTCTTTTGTGATGTGTGTCATTCTCACAGAGTTGAACTTT  
CTTTTGTATTGTAAGTTTCAACACTCTTTTGTAAAATCTGCAAGTGGATATTTGGAGCCCTTTGAGCCCTACAGGGGAAAAGAAA  
TATCTTACATAAAAACTACAGAAGCATTCT

**Supplementary Table S1 | Consensus sequence of 33mer HOR repeat unit in human chromosome 21.**

**Supplementary Figure S1 | Illustrative alignment scheme of monomeric and HOR arrays.**

a, Monomeric array of twelve monomers denoted  $m1, m2, \dots, m12$ . Pairwise sequence divergence among all monomers in the array is sizable,  $\sim 20$  to  $40\%$ . In the alignment scheme there are no two monomers of the same type and therefore all are displayed in the same line. b, HOR array of four 3mer HOR copies denoted  $h1, h2, h3$  and  $h4$ . Pairwise divergence among HOR copies is small. Near identity of HOR copies is a consequence of similarity (at identity level of more than  $\approx 95\%$ ) among the corresponding monomers from all HOR copies: the first monomer in  $h2, h3$  and  $h4$  are very similar to the first monomer  $m1$  in  $h1$ , therefore they are all denoted  $m1$ ; analogously, the second monomer in  $h2, h3$  and  $h4$  are very similar to the second monomer  $m2$  in  $h1$ , therefore they are all denoted  $m2$ ; and the third monomer in  $h2, h3$  and  $h4$  are very similar to the third monomer  $m3$  in  $h1$ , therefore they are all denoted  $m3$ . Thus, each 3mer HOR copy approximately consists of three alpha satellite monomers, denoted  $m1, m2, m3$ . Divergence among four HOR copies:  $\text{div}(h_i, h_j)$  up to  $\sim 5\%$ , ( $i, j = 1, 2, 3, 4; i \neq j$ ). Divergence among monomers within each HOR copy:  $\text{div}(m_k, m_l) \sim 20$  to  $40\%$  ( $k, l = 1, 2, 3$  and  $k \neq l$ ).

Thus, the HOR array is approximately

$m1\ m2\ m3\ m4\ m5\ m6\ m7\ m8\ m9, m10\ m11\ m12$  where

$m1 \approx m4 \approx m7 \approx m10 \neq m2 \approx m5 \approx m8 \approx m11 \neq m3 \approx m6 \approx m9 \approx m12$ .

In approximate monomer alignment scheme this can be presented as:

```

h1  m1  m2  m3
h2  m4  m5  m6
h3  m7  m8  m9
h4  m10 m11 m12.

```

Each column of monomers in that scheme corresponds to one monomer type (column 1 – monomers of type  $m1$ ; column 2 – monomers of type  $m2$ ; column 3 – monomers of type  $m3$ .) Each row corresponds to one HOR copy: (row 1 – HOR copy  $h1$ ; row 2 – HOR copy  $h2$ ; row 3 – HOR copy  $h3$ ; row 4 – HOR copy  $h4$ ). This pattern can be extended to  $n$ mers for any number of monomers  $n$ .

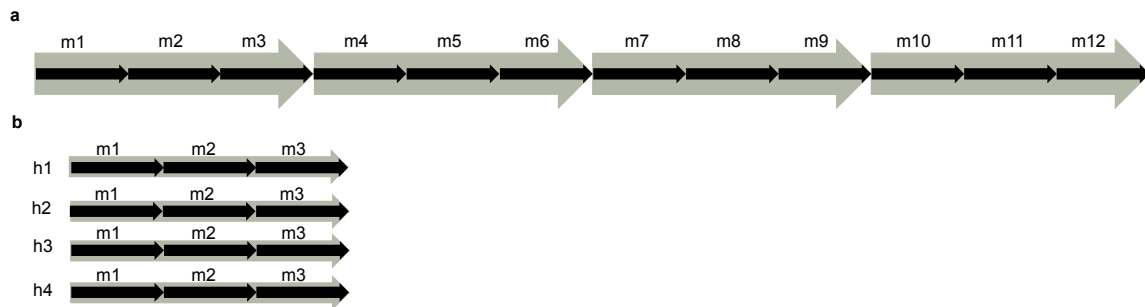

**Supplementary Fig. S2 Dot-matrix diagrams for two 23mers and one 22mer HOR arrays in human chromosome 21. a, 23mer; b, 23mer (reverse); c, 22mer.**

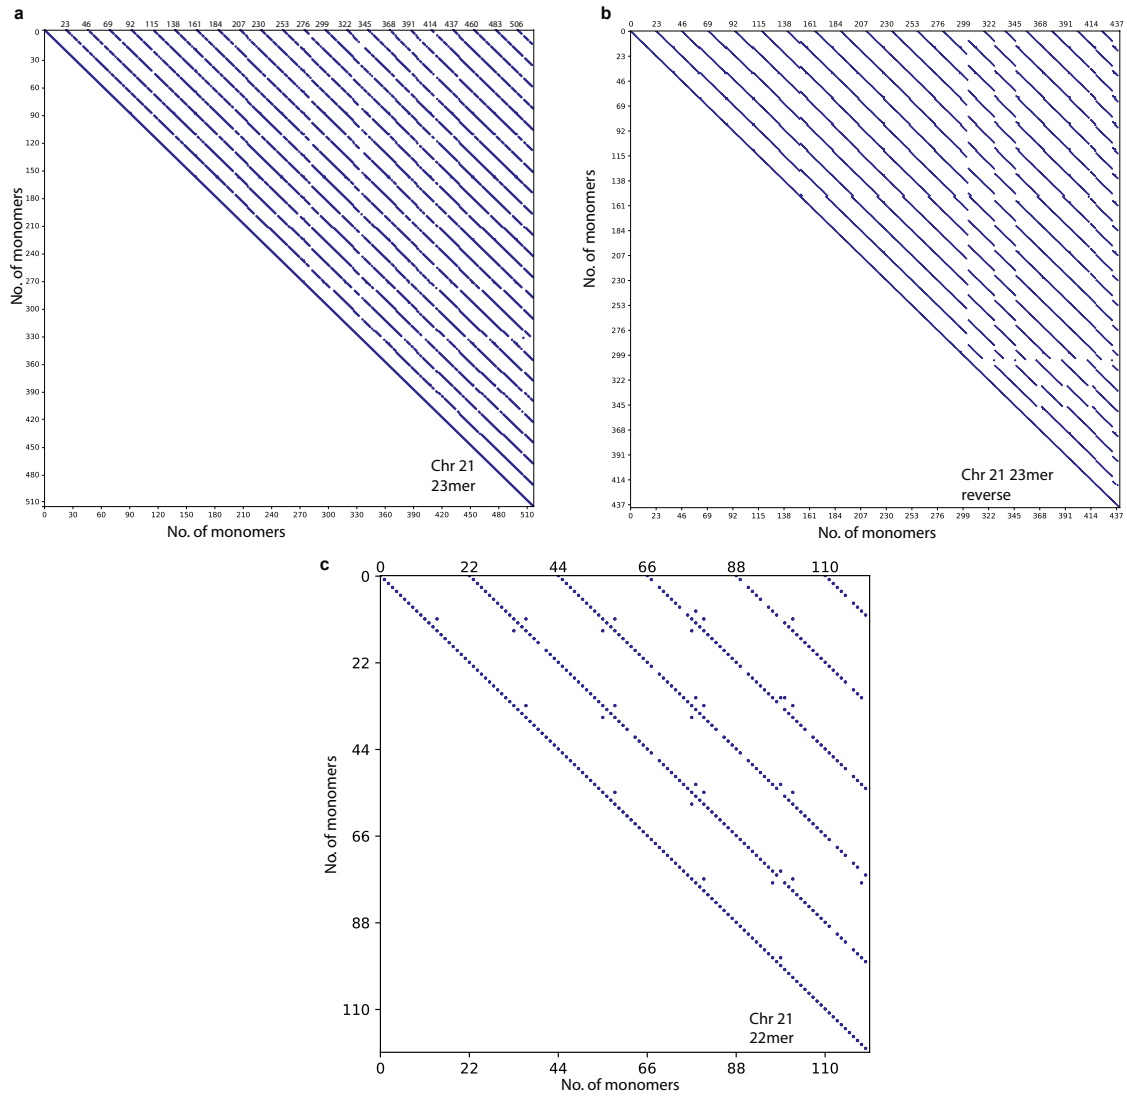

**Supplementary Figure S3 | GRM diagrams for whole chromosomes 13, 14 and 22.**  
a, chromosome 13; b, chromosome 14; c, chromosome 22.

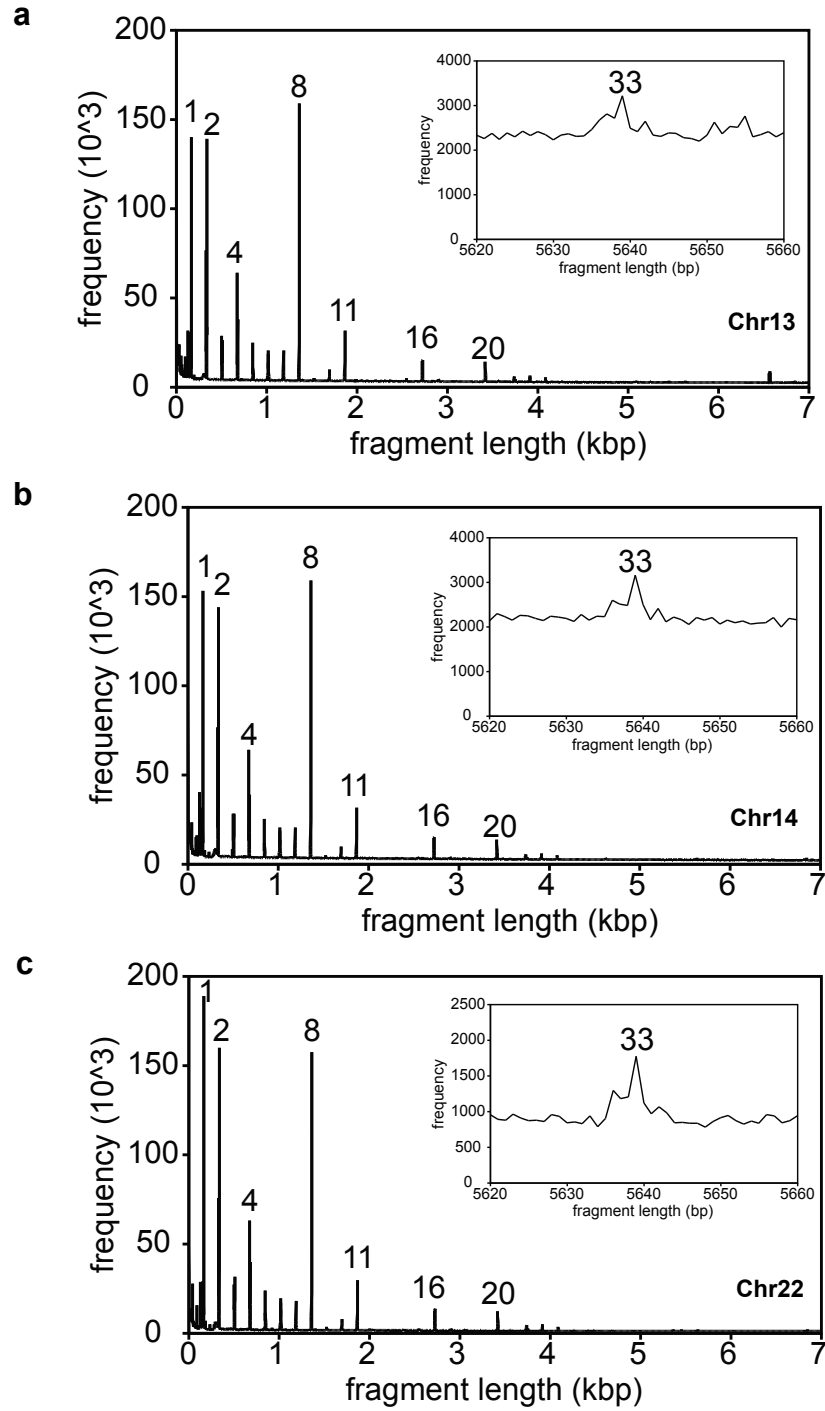

Supplement: 41598_2019_49022_MOESM1_ESM.pdf [file 41598_2019_49022_MOESM1_ESM.pdf]
